# Supplementary material
Source: PubMed Central journal article supplement (PMC4596694)
Supplement: 10-1055-s-0035-1557905-sup_gf952.pdf [file 10-1055-s-0035-1557905-sup_gf952.pdf]

# Sentinel-Lymphknoten-Detektion beim Mammakarzinom mittels Fluoreszenztechnik – eine Alternative zum Technetiumverfahren?

## ICG Fluorescence Technique for the Detection of Sentinel Lymph Nodes in Breast Cancer: Results of a Prospective Open-label Clinical Trial

Autoren

E.-M. Grischke, C. Röhm, M. Hahn, G. Helms, S. Brucker, D. Wallwiener

Institut

Universitäts-Frauenklinik Tübingen, Tübingen

### Schlüsselwörter

- Mammakarzinom
- Mamma
- Gynäkologie
- Epidemiologie

### Key words

- breast cancer
- breast
- gynecology
- epidemiology

### Zusammenfassung

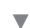

**Einleitung:** Die Detektion des Sentinel-Lymphknotens (SLN) ist mittlerweile ein Standardverfahren zur Erfassung des axillären Lymphknotenstatus beim Mammakarzinom. Neben den bekannten und etablierten Verfahren, wie der blauen Farbstoffmethode und dem szintigrafischen Verfahren, wurde in der vorliegenden Untersuchung die Aussagefähigkeit einer Methode überprüft, basierend auf dem Einsatz eines Fluoreszenzfarbstoffs in Form von Indocyaningrün (ICG).

**Patientinnen und Methoden:** Untersucht wurden dabei insges. 126 Patientinnen mit durch Stanzbiopsie histologisch gesichertem Mammakarzinom im Rahmen der operativen Entfernung des SLN. Neben einer standardmäßigen szintigrafischen Markierung des SLN mittels Technetium erfolgte im intraindividuellen Vergleich anstelle der üblichen Blaumarkierung die Markierung mittels Indocyaningrün (ICG).

**Ergebnisse:** Es konnte mit der Szintigrafie eine Detektionsrate von 96% erreicht werden, mittels ICG eine Rate von knapp 89%. Als limitierender Faktor für das Fluoreszenzverfahren erwies sich ein Body-Mass-Index > 40 (BMI > 40). Die Erfassung von möglicherweise auftretenden Toxizitäten bei Anwendung des Fluoreszenzfarbstoffs ICG ergab keinen Hinweis auf systemische oder auch lokale Nebenwirkungen. Im Kostenvergleich erweist sich die Fluoreszenztechnik als deutlich kostengünstiger als das szintigrafische Verfahren.

**Schlussfolgerung:** Die SLN-Detektion mittels Fluoreszenzverfahren durch Einsatz von ICG erweist sich im klinischen Einsatz und direktem Vergleich zur blauen Farbstoffmethode und dem szintigrafischen Verfahren als valides und praktisches Verfahren.

### Abstract

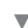

**Introduction:** Detection of sentinel lymph nodes (SLN) is the standard procedure to evaluate axillary lymph node status in breast cancer. In addition to known and established procedures such as the blue dye method and scintigraphy, this study investigated the efficacy of a method based on use of the fluorescent dye indocyanine green (ICG).

**Patients and Method:** A total of 126 women with breast cancer histologically verified by punch biopsy were studied during surgical removal of SLN. In addition to SLN marking with technetium and scintigraphy, intra-individual comparison was done using indocyanine green (ICG) for marking instead of the standard blue dye.

**Results:** Scintigraphy had a detection rate of 96%; the detection rate with ICG was just under 89%. A body mass index (BMI) > 40 was found to be a limiting factor for the fluorescent method. Investigation into potential toxicities associated with the use of the fluorescent dye ICG revealed no systemic or even local side effects. The fluorescent method was found to be significantly less expensive than the scintigraphy method.

**Conclusion:** The ICG fluorescence technique for the detection of SLN was found to be a valid and feasible method in clinical practice when compared directly with the blue dye method and scintigraphy.

eingereicht 11.2.2014

revidiert 25.6.2015

akzeptiert 25.6.2015

### Bibliografie

**DOI** <http://dx.doi.org/10.1055/s-0035-1557905>  
Geburtsh Frauenheilk 2015; 75:  
1–7 © Georg Thieme Verlag KG  
Stuttgart · New York ·  
ISSN 0016-5751

### Korrespondenzadresse

**Prof. Dr. Eva-Maria Grischke**  
Universitäts-Frauenklinik  
Calwerstraße 7  
72076 Tübingen  
Eva-Maria.Grischke@  
med.uni-tuebingen.de

## Einleitung

Die Diagnose und Therapie des frühen Mammakarzinoms konnte in den letzten Jahrzehnten wesentlich verbessert werden durch Einsatz intensiver Diagnostik (u. a. Mammografie-Screening), aber auch durch wesentliche Erkenntnisse über die Biologie von Tumoren in Form von Gensignaturen oder auch Risikoprädiktionsmodellen [1–4]. Ein wesentlicher Schritt auf diesem Wege war die Reduktion der operativen Radikalität der Axilla. Als einem der wesentlichsten Prognosefaktoren kommt dem axillären Lymphknotenstatus weiterhin noch Bedeutung zu [5–7]. Damit ist die histopathologische Erfassung des Nodalstatus nach wie vor Bestandteil der operativen Therapie des invasiven Mammakarzinoms. Der Einsatz der Sentinel-Lymphknoten-Entfernung (SLNB) war der erste Schritt dorthin und ermöglichte eine Reduktion der operativen Radikalität verbunden mit einer durch die axilläre Lymphonodektomie entstandenen Sekundärmorbidität, wie Schmerzempfindungen, eingeschränkte Sensibilität und Lymphödem.

Die Methode der SLNB bestand bereits im Vorfeld und wurde vor allen Dingen bei Tumorentitäten wie dem malignen Melanom, Prostatakarzinom, aber auch gastrointestinalen Tumoren und dem Bronchialkarzinom eingesetzt. Erstes Verfahren und damit Standard für die Markierung des SLN ist die Szintigrafie mit Einsatz von Technetium als Radionuklid. Dies erfordert eine gewisse Lernkurve und erreicht mittlerweile Detektionsraten von weit über 90% bei einer Sensitivität von 91,2% und einer Falsch-Negativ-Rate von 8,8% [9]. In der Literatur findet man Detektionsraten von 86% mit einer Sensitivität von 89% und einer Falsch-Negativ-Rate von 9,1% bis zu Detektionsraten von 96,2% und einer Falsch-Negativ-Rate von 3,7%. Eine Verbesserung der Detektionsraten ergibt sich durch eine weitere Optimierung der Technik und einer entsprechend intensivierten Lernkurve [10–13]. Neben dem Technetiumverfahren wurden rasch weitere Methoden, u. a. die Markierung mit blauem Farbstoff, entwickelt und zum Einsatz gebracht. Durch Anwendung beider Methoden in Kombination kann eine niedrige Falsch-Negativ-Rate von nur noch 5–10% erreicht werden bei höheren Detektionsraten. In der Literatur finden sich deshalb Detektionsraten von 100% für die Szintigrafie und 92,9% für die Blaudarstellung [14]. Da szintigrafische Verfahren mit nicht geringem Aufwand und Kosten verbunden sind und die Existenz einer Klinik bzw. Abteilung für Nuklearmedizin erfordern, führte dies in einigen wenigen Zentren, insbesondere in England dazu, dass nur eine Farbmarmierung mit Blau durchgeführt wurde bzw. eine assistiert eingeschränkte axilläre Lymphonodektomie nach Blaumarmierung [15, 16]. Eine nicht selten eingeschränkte Verfügbarkeit des Radionuklids führte ebenso dazu, weitere neue Detektionsverfahren zu erproben und einzusetzen. Daraus resultierte das Fluoreszenzverfahren mit Einsatz eines fluoreszierenden Farbstoffs in Form von Indocyanin-grün (ICG) [17]. Neben Untersuchungen zum Mammakarzinom zeigen sich hierzu zeitgleich Berichte über den Einsatz beim malignen Melanom, aber auch generell in der Dermatochirurgie sowie beim kleinzelligen Lungenkarzinom und bei gastrointestinalen Tumoren.

Im Rahmen von Studien konnte sich die Fluoreszenzdarstellung mittels ICG alleine oder in Kombination mit der blauen Farbstoffmethode bzw. dem Radionuklidverfahren als sichere, einfach anzuwendende Methode beweisen. Detektionsraten reichen dabei von 100% für Technetium zu 92,9% für die blaue Farbstoffmethode und 99,3% für ICG [14]. Im Direktvergleich der beiden Farb-

stoffmethoden erweist sich ICG mit 99% als sensitiver im Vergleich zur blauen Farbstoffmethode mit 78% [18].

Die vorliegende Studie hatte die Aufgabe, den Stellenwert der Fluoreszenzmethode mit ICG zu überprüfen im Direktvergleich zu Technetium in Form einer prospektiven Studie mit gleichzeitiger Erfassung möglicher auftretender systemischer, aber auch lokaler Toxizitäten. Auf die Applikation eines weiteren Farbstoffs, in diesem Falle der blauen Farbstoffmarkierung, wurde verzichtet, um mögliche Interaktionen zweier Farbstoffmethoden zu vermeiden.

## Material und Methodik

### Fragestellung und Studiendesign

Im Rahmen einer nicht randomisierten, monozentrischen Phase-II-Studie wurden insges. 126 Patientinnen untersucht. Dabei wurde eine SLN-Detektion nach konventioneller Technetiummarkierung und parallel dazu im intraindividuellen Vergleich eine Detektion nach intradermaler Injektion des Farbstoffs ICG mittels Fluoreszenz durchgeführt. Erfasst wurde die Anzahl der mittels der beiden Verfahren detektierten Lymphknoten in direktem Vergleich, bezogen auf die einzelne Patientin, sowie zusätzlich die Anzahl der insges. mit den verschiedenen Methoden detektierten SLN. Zur Überprüfung der Verträglichkeit von ICG wurden Basisdaten wie BMI und Sicherheitslabor sowie potenzielle Reaktionen wie Tätowierung der Haut erfasst.

### Methodik der Technetiummarkierung und Fluoreszenzdarstellung

Patientinnen, die die Ein- und Ausschlusskriterien für eine SLNB mit stanziobioptisch gesichertem Mammakarzinom erfüllten, konnten in die Studie eingebracht werden. Die Indikationsstellung erfolgte nach gültiger Leitlinie [7]. Die Patientinnen erhielten zur Darstellung des SLN 99mTC Nanocoll® sowie Indocyanin-grün (ICG der Firma Pulsion). Bei der Technetiummarkierung wurde kommerziell verfügbares Nanocoll® (Human Albumin 500 µ/Vial) der Firma GE Healthcare eingesetzt. Nanocoll® wurde mit Natriumpertechnetat (99m TC) verdünnt, um Technetium 99m an Albumin gebunden, als Nanocolloidinjektionslösung zur Applikation herzustellen. Die applizierte 99-m-TC-Nanocoll-Menge wurde protokollgerecht subkutan periareolär injiziert. Verabreicht wurden zwischen 39–102 Mbq analog der in der klinischen Routine üblichen Dosierung.

Die Applikation erfolgte am Nachmittag des Vortags vor dem operativen Eingriff bzw. am OP-Tag jeweils morgens. Beim Zweitagesprotokoll wurden üblicherweise 50–80 MBq TC injiziert, beim Eintagesprotokoll erhielten die Patientinnen in der Regel 20–40 Mbq Tc.

ICG-Pulsion wurde unmittelbar zu OP-Beginn zubereitet. Ein Vial mit Prüfmedikation abgepackt jeweils in Form von 25 mg Indocyanin-grün wurde mit 5 ml Aquadest zur Injektion gelöst. 2 ml der Lösung (10 mg) ICG wurden unmittelbar präoperativ intradermal periareolär in das tumortragende Segment injiziert. Angeschlossen wurde eine 10–15-minütige Massage bis zum Beginn der Detektion. Diese erfolgte mittels Fluoreszenztechnik mit einer speziellen Kamera, die über Dioden (Leads) Licht bei einer Wellenlänge von 760 nm produziert und gleichzeitig das Fluoreszenzsignal aufnimmt. Die entsprechend hierzu verwandte CCD-Kamera ist in der Lage, Licht bei einer Wellenlänge unter 820 nm zu filtern. Das Fluoreszenzsignal wurde dabei in eine

### Hautinzision nach Identifikation der Lymphbahn, Abbruch bei Tiefertreten in das Fettgewebe mit SLN-Detektion und -Exzision

Darstellung der fluoreszierenden Lymphbahnen im subkutanen Verlauf zur Markierung der Hautinzisionsstelle für die Lokalisation des Sentinels

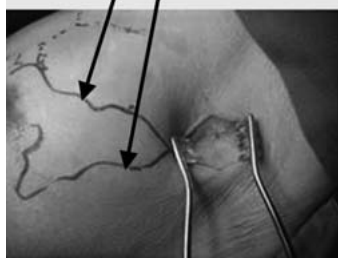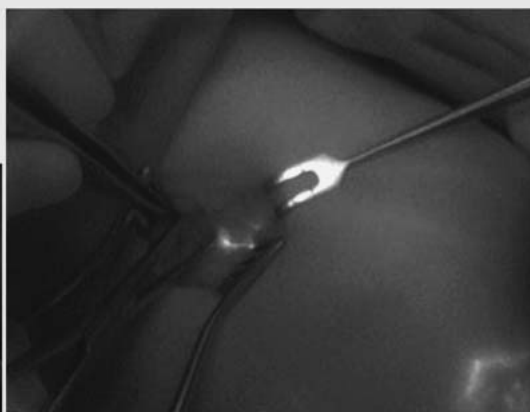

**Abb. 1** Praktische Anwendung von ICG zur Sentinel-Detektion und -Exstirpation. Hautinzision nach Identifikation der Lymphbahn, Abbruch bei Tiefertreten in das Fettgewebe mit SLN-Detektion und -Exzision.

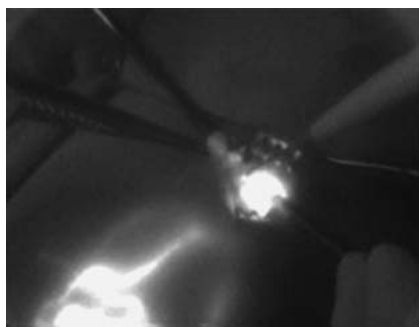

**Abb. 2** Dargestellte Lymphbahn und fluoreszierender Sentinel-Lymphknoten.

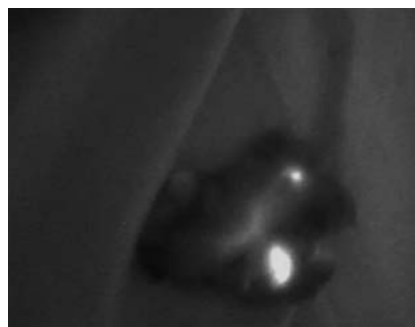

**Abb. 3** Exstirpiertes Fettgewebe mit ausschließlich mittels Fluoreszenz darstellbaren Lymphknoten und Lymphbahn.

schwarze und weiße Bilddarstellung transferiert und kontinuierlich auf einem Monitor zur Darstellung gebracht [19].

Bei der praktischen Durchführung wurden Lymphbahnen vom Injektionsdepot ausgehend dargestellt und in ihrem Verlauf zur Axilla verfolgt (◉ **Abb. 1**). An der Stelle des Abbruchs der Lymphbahnen und damit einem Tiefertreten des fluoreszierenden Farbstoffs in tiefere subkutane Gewebsschichten wurde der Sentinel-Lymphknoten vermutet. An dieser Stelle wurde die Haut markiert und in üblicher Weise inzidiert. Bei diesem Vorgehen wurde von einer Eindringtiefe und damit Detektierbarkeit der Fluoreszenz von bis zu 1,5 cm bis max. 2 cm Hautdicke ausgegangen. In der Regel konnte damit ein erster fluoreszierender Lymphknoten dargestellt werden (◉ **Abb. 2**). Parallel erfolgte unmittelbar im Anschluss dazu die konventionelle Detektion des im Vorfeld mittels Technetium markierten SLN. Routinemäßig wurde dabei der mittels Fluoreszenz detektierte SLN bzw. die Sentinelgruppe hinsichtlich Radioaktivität überprüft. Erfasst wurde dabei die an der Gammasonde Neoprobe ablesbare übliche Messgröße Counts per Second (CPS), die auf die TC-Aktivität in MBq umgerechnet werden kann. Nach entsprechender nochmaliger Überprüfung der Fluoreszenz mit entsprechender Dokumentation wurde der Lymphknoten exstirpiert (◉ **Abb. 3**).

In der Folge wurden gemäß der üblichen Routine nochmals die beiden Methoden bez. weiterer detektierbarer Lymphknoten überprüft. Falls weitere Signalgebung bzw. Fluoreszenz zu erkennen waren, wurden weitere Lymphknoten entfernt.

### Datenerfassung und Auswertung

Die histopathologische Aufarbeitung der einzelnen getrennt abgegebenen und gekennzeichneten SLN wurde jeweils separat durchgeführt und dokumentiert. Im Protokoll wurde aufgeführt, mit welcher der beiden Detektionsverfahren eine Erkennung des jeweiligen SLN gelang. Nur in wenigen Fällen zeigte sich bei der Auflistung der einzelnen Lymphknotenfraktionen keine Übereinstimmung der beiden Detektionsverfahren.

In der Gesamtbeurteilung wurde der Detektionsnachweis mit den beiden Verfahren bezogen auf die Patientin bzw. Axilla und nicht nach Einzelaufstellung der SLN erfasst.

Aus Gründen der Vergleichbarkeit entsprechender Literaturangaben wurde zusätzlich die Anzahl aller mit den jeweiligen Methoden detektierten Lymphknoten aufgelistet.

### Erfassung von Toxizitäten

Da es sich um eine Phase-II-Studie handelte, erfolgte eine Überprüfung von Verträglichkeit und Erfassung potenziell auftretender Nebenwirkungen des eingesetzten Fluoreszenzfarbstoffs ICG der Firma Pulsion. Deshalb wurde auf das Auftreten von Organtoxizitäten sowie auf lokale Toxizitäten nach intradermaler Injektion geachtet. Bei intradermaler ICG-Applikation, abweichend von der gemäß Zulassung üblichen intravenösen Applikation, wurden Routinelaboruntersuchungen veranlasst, ebenso eine lokale Kontrolle der Injektionsstelle. Dabei wurde auf Verfärbungen im Sinne einer Tätowierung der Haut geachtet sowie eine Erfassung von Hautreaktionen in Form von Rötung oder Schwellung vorgenommen.

## Ergebnisse

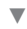

### Erfassung der Patientinnencharakteristika und Tumorstadien

Rekrutiert wurden insges. 126 Patientinnen, wobei bei 17 Patientinnen eine Protokollverletzung vorlag bei nicht protokollgerechter Applikation des Fluoreszenzfarbstoffs. Sie wurden bei der weiteren Auswertung nicht berücksichtigt. Bei weiteren 4 Patientinnen war die Indikation zur SLN-Biopsie nicht gegeben bei Verdacht auf Tumorbefall der axillären Lymphknoten gemäß Bildgebung und Palpation. Damit kamen Daten von 105 Patientinnen vor. Das Durchschnittsalter der Patientinnen betrug 57,5 Jahre, 5 Patientinnen waren älter als 80 Jahre (81, 82 und 3 × 84 Jahre). Das häufigste Tumorstadium war im Gesamtkollektiv ein Tumorstadium pT2 in 43 Fällen, gefolgt von einem Tumorstadium pT1c in 42 Fällen. Ein Tumorstadium pT1a trat bei 3 Patientinnen auf und ein Tumorstadium pT1b bei 21 Patientinnen. Insgesamt wiesen 17 Patientinnen ein ausgedehntes pTis auf oder ein pTmic. Dabei lag ein Grading G 1 in 23%, G 2 in 45% und G 3 in 32% vor.

Der Durchschnitts-BMI betrug  $26 \pm 5,32$ . Drei Patientinnen wiesen einen BMI > 40 auf.

### Detektierbarkeit von Lymphknoten

#### Methodenvergleich bezogen auf die Lymphknotendetektion mittels Technetium und ICG im intraindividuellen Vergleich

Von 105 auswertbaren Patientinnen gelang eine Detektion des SLN mit Technetium in 104 Fällen, was einer Detektionsrate von 98% entspricht. Mittels ICG gelang die Detektion bei 93 Patientinnen und damit in knapp 89%. Ein SLN-Nachweis mit ICG und Technetium gelang bei 91 der 105 Patientinnen. Ein SLN-Nachweis mit ICG, aber nicht mit Technetium zeigte sich bei 2 der 105 Patientinnen, ein Nachweis mittels Technetium und nicht mittels ICG kam bei 12 der 100 Patientinnen vor (● Tab. 1). Mittels beider Methoden konnten insges. 162 SLN detektiert und exstirpiert werden. Dabei konnten mittels Technetium 157 SLN detektiert werden (96%), mittels ICG 138 SLN (85%). Damit wurden 96% SLN mit Technetium detektiert (● Tab. 2).

Zwei der Patientinnen in der Gruppe mit Technetiumdetektion des SLN ohne Nachweis bzw. Darstellbarkeit mit ICG wiesen einen BMI von > 40 auf (BMI 40,4 und 40,9). Das Zeitintervall von Injektion des ICG-Fluoreszenz-Farbstoffs bis zum Beginn der SLN-Detektion betrug mindestens 10 Minuten, maximal 25 Minuten gemäß vorgeschriebenem Protokoll und in Abhängigkeit des brustchirurgischen Vorgehens. Die Zeit von Beginn der Detektion bis zur SLN-Exstirpation betrug zwischen 8–10 Minuten.

#### Detektion der SLN mit beiden Verfahren unabhängig von einem potenziellen karzinomatösen Tumorbefall

Bei 91 Patientinnen gelang die SLN-Detektion mit ICG und Technetium simultan bezogen auf den jeweiligen exstirpierten Lymphknoten bzw. das Lymphknotenpräparat. In der Gruppe der Patientinnen, bei denen eine SLN-Detektion mittels Technetium und nicht mittels ICG gelang, zeigte sich bei 2 Patientinnen ein Tumorbefall. In der Gruppe mittels Technetium und ICG detektierter SLN zeigte sich ein karzinomatöser Lymphknotenbefall bei insges. 25 Patientinnen nach histologischer Aufarbeitung (● Tab. 3). In der Gruppe der Patientinnen, bei denen mit keiner der beiden Methoden eine SLN-Detektion gelang, wurde nochmals das histologische Ergebnis überprüft. Dabei zeigte sich kei-

**Tab. 1** SLN-Detektion mit TC und Fluoreszenztechnik bei 105 Patientinnen.

|                                        |               |
|----------------------------------------|---------------|
| ▶ davon mit TC detektiert              | n = 103 (98%) |
| ▶ davon mit ICG detektiert             | n = 93 (89%)  |
| ▶ SN-Nachweis mit ICG und Tc bei       | n = 91/105    |
| ▶ SN-Nachweis mit ICG und nicht Tc bei | n = 2/105     |
| ▶ SN-Nachweis mit TC und nicht ICG bei | n = 12/105    |

**Tab. 2** Gesamtzahl der mit den verschiedenen Methoden detektierten SLN.

|                                              |           |
|----------------------------------------------|-----------|
| ▶ Anzahl der gesamt detektierten SLN         | 162       |
| ▶ Anzahl der mit TC detektierten SLN         | 157 (96%) |
| ▶ Anzahl der mit ICG detektierten SLN        | 138 (85%) |
| ▶ Anzahl der mit Tc und ICG detektierten SLN | 133 (82%) |
| ▶ Sensitivität 0,96 CI                       | 0,92–0,99 |
| ▶ Positiver prädiktiver Wert 0,85 CI         | 0,78–0,9  |
| ▶ Spezifität 0,82 CI                         | 0,75–0,88 |

**Tab. 3** Anzahl positiver Lymphknoten N+ (Tumorbefall), Abhängigkeit der Detektionsmethode.

|                                  |        |              |
|----------------------------------|--------|--------------|
| ▶ SN-Detektion mit ICG und TC    | n = 91 | N+ in n = 25 |
| ▶ SN-Detektion mit ICG, nicht TC | n = 2  | N+ in n = 0  |
| ▶ SN-Detektion mit TC, nicht ICG | n = 12 | N+ in n = 2  |

ne Korrelation zwischen fehlender Lymphknotendetektion und einem histopathologisch nachgewiesenen karzinomatösen Lymphknotenbefall.

### Erfassung von weiteren Einschlussvariablen auf die Fluoreszenzmethode

#### Bedeutung des Body-Mass-Index (BMI)

Mittels ICG betrugen die Detektionsraten bei einem BMI unter 40 (< 40 BMI) 89%. Überprüft man die Detektionsrate bei einem Cut-off von < 30 oder 35 BMI, zeigten sich ebenfalls keine Unterschiede. Ausschließlich bei einem BMI > 40 erwies sich die Detektion mittels ICG als schwierig. Hier konnte bei 2 von 3 Patientinnen kein SLN mittels Fluoreszenz detektiert werden. Eine mögliche Erklärung dafür könnte sein, dass das Fluoreszenzverfahren nur bis zu einer Eindringtiefe von max. 2 cm als ausreichend sicher beschrieben wird.

### Arzneimittelsicherheit

#### Erfassung möglicher systemischer und lokaler Toxizitäten

Zur Überprüfung der Arzneimittelsicherheit wurden in zeitlicher Korrelation mit der Verabreichung von ICG aufgetretene Nebenwirkungen erfasst. Diese traten nur in einem geringen Ausprägungsgrad (Grad I und II) auf und sie sind nicht im Zusammenhang mit der intradermalen Injektion ICG zu sehen (● Tab. 4). Es mussten daraus keine therapeutischen Konsequenzen gezogen werden. Lokal zeigten sich keine Hautveränderungen in Form allergischer Reaktionen oder anhaltender Tätowierung der Haut. Die intradermale Injektion von ICG unterscheidet sich damit nicht von dem Sicherheitsprofil bei intravenöser Verabreichung.

**Tab. 4** Aufgetretene Ereignisse im Rahmen der Toxizitätserfassung.

| Untersuchungs-Nr. | Ereignis                         | anhaltend | schwerwiegend | Stärke | Beziehung  | vorgenommene Handlung | Folgen                    |
|-------------------|----------------------------------|-----------|---------------|--------|------------|-----------------------|---------------------------|
| 063               | Tachykardie, Grad 2              | 0         | nein          | mittel | kein Bezug | keine                 | erholt/gelöst             |
| 063               | Erbrechen, Grad 1                | 0         | nein          | leicht | kein Bezug | keine                 | erholt/gelöst             |
| 063               | Übelkeit, Grad 1                 | 0         | nein          | leicht | kein Bezug | keine                 | erholt/gelöst             |
| 083               | Schmerzen bei Redon-Saugdrainage | 0         | nein          | mittel | kein Bezug | keine                 | erholt/gelöst             |
| 111               | Übelkeit                         | 0         | nein          | mittel | kein Bezug | keine                 | erholt/gelöst             |
| 111               | Erbrechen                        | 0         | nein          | leicht | kein Bezug | keine                 | erholt/gelöst             |
| 126               | hoher Leukozytenwert, Grad 2     | 1         | nein          | mittel | kein Bezug | keine                 | nicht erholt/nicht gelöst |

## Diskussion

Die SLNB gilt als akzeptiertes und validiertes Standardverfahren zum Staging der Axilla bei klinisch und morphologisch unauffälligem Status im Rahmen der primären operativen Therapie des Mammakarzinoms. Dabei werden kombinierte Detektionsverfahren in Form der blauen Farbstoffmarkierung in Kombination mit der Radionuklidtechnik am häufigsten angewandt mit einer geringen Falsch-Negativ-Rate von nur 9,8% [8].

Im Rahmen von großen Studien mit einem Median-Follow-up von 97 Monaten konnte gezeigt werden, dass die SNB-Methode im Vergleich zu einer kompletten axillären Lymphonodektomie bei nodal negativen Patientinnen keinen Unterschied aufwies bez. der Häufigkeit eines lokoregionären Rezidivs, aber auch bez. des Gesamtüberlebens [19, 20]. Das SNB-Verfahren gilt damit als valide Methode in der klinischen Routine.

Die in der vorliegenden Studie nicht eingesetzte blaue Farbstoffmethode erweist sich in der Literatur als ein Verfahren mit geringerer Sensitivität, was dazu führt, dass mehr Lymphknoten im Vergleich zum kombinierten Verfahren entfernt werden [16]. Im Durchschnitt waren es in den Studien dabei 4–5 Lymphknoten, während im Vergleich zu den kombinierten Methoden nur 2–3 Lymphknoten entfernt wurden.

Auf der Suche nach weiteren Verfahren zur SLN-Markierung fand das Fluoreszenz-Verfahren Einsatz. Initial finden sich in der Literatur nur kleine Patientenzahlen und auch verschiedene Studienansätze. Bei 2 Studien von Hirche et al. wurden jeweils nur 43 bzw. 47 Patientinnen untersucht [21]. Das Fluoreszenzverfahren kam in ganz unterschiedlichen Studienansätzen zum Einsatz. In der Literatur finden sich Daten mit dem Fluoreszenzfarbstoff ICG als alleinige Methode, ebenso in Kombination mit Technetium, in Kombination mit der blauen Farbstoffmethode, aber auch im Vergleich aller 3 Verfahren. Ein alleiniger Einsatz von ICG findet sich insges. in 7 Studien, wobei dabei immerhin größere Fallzahlen zum Einsatz kamen mit 128 bzw. 145 Patientinnen. Von wesentlichem Interesse ist der Vergleich zwischen Fluoreszenz und Technetium als Standardmethode.

Vergleichende Studien im Vorfeld zeigten allerdings bei kleinen Patientenzahlen eine gute Korrelation zur Technetiummethode mit Detektionsraten von 94–100% nach intradermaler oder auch subdermaler Applikation [18, 22–25].

Die Studien hatten gezeigt, dass die ICG-Fluoreszenz-Methode damit eine hohe SLN-Detektionsrate aufweist, bei einer mit der Technetiummethode vergleichbaren Falsch-Negativ-Rate [19, 21, 26–29]. Die Daten der eigenen Untersuchung korrelieren damit mit Detektionsraten für Technetium mit 98% und für ICG mit 89% bei einem immerhin großen Kollektiv von 105 Patientinnen.

Bei Durchsicht der Literatur zeigen sich nicht unerhebliche methodische Unterschiede bez. Injektionstechnik und auch verwendeter ICG-Mengen. Die in der vorliegenden Studie verwendeten ICG-Mengen basieren auf Dosisfindungsuntersuchungen, wobei sich eine Dosis von 10 mg ICG als sichere und gleichzeitig effektive Methode, insbes. im Vergleich zu einer 5-mg-Dosierung erwies [23]. Diese Dosierung von ICG konnte auch in anderen Studien bestätigt werden [19, 30–32].

Trotz zahlreicher vorliegender Studien findet sich als eine direkt vergleichbare Studie gemäß Design und adäquater Patientenzahl nur die prospektive Studie von Wishart et al. mit 100 Patientinnen [33]. Bezogen auf die exstirpierten und detektierten Lymphknoten zeigte die ICG-Detektion eine Rate von 100%, die Detektion mit ICG und Technetium nur 77,3%. In Zahlen bedeutet dies für die Radionuklidmethode alleine 156 detektierte Lymphknoten von insges. 201 und für ICG-Fluoreszenz eine komplette Detektion aller exstirpierten Lymphknoten. Die eigenen Zahlen belegen mit ICG eine Detektion von 136 bei insges. 154 Lymphknoten sowie mit Technetium eine Detektionsrate von 147 der 154 exstirpierten Lymphknoten. Damit weisen die Daten aus beiden Studien eine deutliche Vergleichbarkeit auf.

Bei einigen Studien wurden neben Technetium zusätzlich noch die Blaudarstellung durchgeführt [33]. Die Studien mit größeren Patientenzahlen zeigten neben der bereits erwähnten Studie von Wishart et al. zwar große Patientenzahlen ( $n = 411$  Patientinnen), allerdings wurde nur ICG mit Blaudarstellung überprüft [18]. Eine größere Studie mit 142 Patientinnen, bei der ICG ausschließlich mit Blaudarstellung verglichen wurde, erwies sich als retrospektiv angelegte Studie [29].

In der vorliegenden Arbeit wurde bewusst ICG mit dem „Golden Standard“ Technetium verglichen und auf eine zusätzliche Blau-markierung verzichtet. Die Gründe bestanden darin zu überprüfen, ob auf eine Technetiummarkierung zugunsten von ICG prospektiv möglicherweise verzichtet werden kann. Berücksichtigt wurde dabei auch, dass in der Literatur die Blau-markierungen geringere Detektionsraten aufweisen im Vergleich zu Technetium. Da die aktuell vorliegende Studie gleichzeitig die Aufgabe hatte, Toxizitäten bei intradermaler Injektion von ICG zu erfassen, musste bewusst auf eine Blau-markierung verzichtet werden. In den Untersuchungen mit größeren Patientenzahlen aus Arbeitsgruppen, bei denen Technetium oder blauer Farbstoff im Vergleich zur Fluoreszenzmarkierung zum Einsatz kamen, zeigte ICG nur eine minimal geringere Detektionsrate im Vergleich zu der Technetiummarkierung. Vergleichbare Studien konnten Detektionsraten von 86 bzw. 90% erreichen [10].

Vor dem Hintergrund dieser Ergebnisse kann die in der vorliegenden Studie erreichte Detektionsrate von 89% für ICG bezogen

auf die einzelne Patientin mittels ICG im Vergleich zu Technetium als effektive und valide Methode bestätigt werden. Erschwerend für den Vergleich ist der Einsatz unterschiedlicher Methoden und Konzentrationen, aber auch Auswertungen [34].

Die ausschließlich in der vorliegenden Arbeit durchgeführte Korrelation der Lymphknotendetektion mit dem BMI konnte erstmals zeigen, dass die Methode deutlich von einem BMI abhängig ist. Als Cut-off erwies sich ein BMI > 40. Methodisch kann dies dadurch erklärt werden, dass eine Darstellbarkeit von Lymphbahnen mittels Fluoreszenz nur bis zu einer maximalen Tiefe von 1,5–2 cm möglich ist. So konnte bei 12 nicht detektierbaren Sentinels mittels der ICG-Methode immerhin in 2 Fällen ein BMI > 40 nachgewiesen werden. Im Gesamtkollektiv fand sich allerdings ein BMI > 40 nur bei 3 von 105 Patientinnen. Nebenwirkungen traten durch die intradermale ICG-Applikation nicht auf, sodass eine intradermale Injektion auch unter Berücksichtigung systemischer Nebenwirkungen keine Unterschiede zu der intravasalen Applikation aufwies.

Wie bei jedem SLNB-Verfahren ist im praktischen Einsatz eine Lernkurve erforderlich.

Der Kostenaspekt zeigt für die Technetiummethode im Durchschnitt Kosten im Bereich von € 300–350, für die ICG-Fluoreszenz-Methode Kosten von knapp € 100. Werden, wie in den meisten Zentren, aktuell Technetium und die blaue Farbdarstellung angewandt, belaufen sich die Kosten auf € 450–500. Neben Erfassung von Qualitätsmerkmalen bei der Behandlung des Mammakarzinoms ist eine Kosten-Nutzen-Analyse ein ebenfalls wichtiges Qualitätsmerkmal [35].

## Schlussfolgerung

Die SLN-Detektion mittels Fluoreszenzverfahren durch Einsatz von ICG erweist sich im klinischen Einsatz und direktem Vergleich zur Technetiummethode als valides und praktikables Verfahren. Mit einer Detektionsrate von knapp 89% ist sie im Vergleich zu dem Technetiumstandard mit 98% nur geringfügig abweichend.

In der vorliegenden Untersuchung konnte erstmals eine Abhängigkeit der Aussagefähigkeit von dem BMI gezeigt werden. Bei einem BMI > 40 erweist sich die Methode als eingeschränkt einsetzbar, resultierend aus einer fehlenden Darstellbarkeit der Lymphbahnen. Im Studienansatz konnten keine systemischen oder lokalen Toxizitäten beobachtet werden. Kostentechnisch entfällt bei dem Fluoreszenzverfahren die für eine Technetiumdarstellung erforderliche Verabreichung von Radioaktivität, was damit mit einem geringerem technischen Aufwand und geringeren Kosten vergesellschaftet ist.

Durch Einsatz möglicherweise neuerer Technologien, insbesondere einer Kamera mit verbessertem Auflösungsvermögen, ist mit einer höheren Akzeptanz vonseiten des Anwenders, aber auch mit höheren Detektionsraten zu rechnen.

## Interessenkonflikt

Nein.

## Literatur

- 1 Fasching PA, Ekici AB, Wachter DL et al. Breast cancer risk – from genetics to molecular understanding of pathogenesis. *Geburtsh Frauenheilk* 2013; 73: 1228–1235
- 2 Heywang-Koebrunner S, Bock K, Heindel W et al. Mammography screening – as of 2013. *Geburtsh Frauenheilk* 2013; 73: 1007–1016
- 3 Sinn P, Aulmann S, Wirtz R et al. Multigene assays for classification, prognosis, and prediction in breast cancer: a critical review on the background and clinical utility. *Geburtsh Frauenheilk* 2013; 73: 932–940
- 4 Lux MP, Maass N, Schütz F et al. Breast cancer 2013 – interpretation of new and known data. *Geburtsh Frauenheilk* 2013; 73: 584–598
- 5 Hubalek M, Bartsch R, Gnani M et al. Axillary dissection in the case of positive sentinel lymph nodes: results of the Innsbruck Consensus Conference. *Geburtsh Frauenheilk* 2012; 72: 293–298
- 6 Leitlinienprogramm Onkologie S3. Leitlinie Mammakarzinom. AWMF (Registernummer 032-045OL) Juli 2012
- 7 AGO Guidelines Breast Version 2014. Publiziert bei der AGO e.V.. Online: <http://www.ago-online.de/en/guidelines-mamma/march-2014/>
- 8 Lyman GH, Giuliano AE, Somerfield MR et al.; American Society of Clinical Oncology. American Society of Clinical Oncology guideline recommendations for sentinel lymph node biopsy in early-stage breast cancer. *J Clin Oncol* 2005; 23: 7703–7720
- 9 Veronesi U, Paganelli G et al. A randomized comparison of sentinel-node biopsy with routine axillary dissection in breast cancer. *N Engl J Med* 2003; 349: 546–553
- 10 McMasters KM, Tuttle TM, Carlson DJ et al. Sentinel lymph node biopsy for breast cancer: a suitable alternative to routine axillary dissection in multi-institutional practice when optimal technique is used. *J Clin Oncol* 2000; 18: 2560–2566
- 11 Rubio I, Korourian S, Christopher C et al. Sentinel lymph node biopsy for staging breast cancer. *Am J Surg* 1998; 176: 532–537
- 12 Krag D, Weaver D, Ashikaga T et al. The sentinel node in breast cancer – a multicenter validation study. *N Engl J Med* 1998; 339: 941–946
- 13 Rubio I, Korourian S, Christopher C et al. Sentinel lymph node biopsy for staging breast cancer. *Am J Surg* 1998; 76: 532–537
- 14 Hojo T, Nagao T, Kikuyama M et al. Evaluation of sentinel node biopsy by combined fluorescent and dye method and lymph flow for breast cancer. *Breast* 2010; 19: 210–213
- 15 Purushotham AD, Macmillan RD, Wishart GC. Advances in axillary surgery for breast cancer – time for a tailored approach. *Eur J Surg Oncol* 2005; 31: 929–931
- 16 Benson JR, Querci della Rovere G. Management of the axilla in women with breast cancer. *Lancet Oncol* 2007; 8: 331–348
- 17 Motomura K, Inaji H, Komoike Y et al. Sentinel node biopsy guided by indocyanine green dye in breast cancer patients. *Jap J Clin Oncol* 1999; 29: 604–607
- 18 Sugie T, Kassim KA, Takeuchi M et al. A novel method for sentinel lymph node biopsy by indocyanine green fluorescence technique in breast cancer. *Cancers (Basel)* 2010; 2: 713–720
- 19 Abe H, Umeda T, Mori M et al. Indocyanine green fluorescence imaging system for sentinel lymph node biopsy in early breast cancer patients. *J Clin Oncol* 2010; 28 (Suppl. 15): 6492
- 20 Krag DN, Anderson J, Julian TB et al. Comparison of sentinel lymph node resection to conventional axillary dissection in clinically node negative breast cancer patients: primary outcome results of NSABP B032 trial. *Lancet Oncol* 2010; 11: 927–933
- 21 Hirche C, Murawa D, Mohr Z et al. ICG fluorescence-guided sentinel node biopsy for axillary nodal staging in breast cancer. *Breast Cancer Res Treat* 2010; 121: 373–378
- 22 Tagaya N, Yamazaki R, Nakagawa A et al. Intraoperative identification of sentinel lymph nodes by near infra-red fluorescence imaging in patients with breast cancer. *Am J Surg* 2008; 195: 850–853
- 23 Hünerbein M. Expert report on Indocyanine green (ICG) application for sentinel node detection by fluorescence. 2009. Mitteilung der Fa. Pulsion
- 24 Kitai T, Inomoto T, Miwa M et al. Fluorescence navigation with indocyanine green for detecting sentinel lymph nodes in breast cancer. *Breast Cancer* 2005; 12: 211–215
- 25 Murawa D, Hirche C, Dresel S et al. Sentinel lymph node biopsy in breast cancer guided by indocyanine green fluorescence. *Br J Surg* 2009; 11: 1289–1294

- 26 Aoyama K, Kamio T, Ohchi T *et al.* Sentinel lymph node biopsy for breast cancer patients using fluorescence navigation with indocyanine green. *World J Surg Oncol* 2011; 9: 157
- 27 Cody HS 3rd, Fey J, Akhurst T *et al.* Complementarity of blue dye and isotope in sentinel node localization for breast cancer: univariate and multivariate analysis of 966 procedures. *Ann Surg Oncol* 2001; 8: 13–19
- 28 Hirche C, Mohr Z *et al.* High rate of solitary sentinel node metastases identification by fluorescence-guided lymphatic imaging in breast cancer. *J Surg Oncol* 2011; 105: e162–e166
- 29 Hojo T, Nagao T, Kikuyama M *et al.* Evaluation of sentinel node biopsy by combined fluorescent and dye method and lymph flow for breast cancer. *Breast* 2010; 210–213
- 30 Ballardini B, Santoro L, Sangalli C *et al.* The indocyanine green method is equivalent to the <sup>99m</sup>Tc-labeled radiotracer method for identifying the sentinel node in breast cancer: a concordance and validation study. *Eur J Surg Oncol* 2013; 39: 1332–1336
- 31 Polom K, Murawa D, Nowaczyk P *et al.* Breast cancer sentinel lymph node mapping using near infrared guided indocyanine green and indocyanine green-human serum albumin in comparison with gamma emitting radioactive colloid tracer. *Eur J Surg Oncol* 2012; 38: 137–142
- 32 Takeuchi M, Sugie T, Abdelazeem K *et al.* Lymphatic mapping with fluorescence navigation using indocyanine green and axillary surgery in patients with primary breast cancer. *Breast J* 2012; 18: 535–541
- 33 Wishart GC, Loh SW, Jones L *et al.* A feasibility study (ICG-10) of indocyanine green (ICG) fluorescence mapping for sentinel lymph node detection in early breast cancer. *Eur J Surg Oncol* 2012; 38: 651–656
- 34 Mieog JS, Troyan SL, Hutterman M *et al.* Toward optimization of imaging system and lymphatic tracer for near-infrared fluorescent sentinel lymph node mapping in breast cancer. *Ann Surg Oncol* 2011; 18: 2483–2491
- 35 Solomayer EF, Rody A, Wallwiener D *et al.* Assessment of university gynaecology clinics based on quality reports. *Geburtsh Frauenheilk* 2013; 73: 705–712
